# MIND TO MIND

Creative writing that explores the abstract side of our profession and our lives

*Stephen T. Harvey, M.D., Editor*

## Stars

Christoph N. Seubert, M.D., Ph.D., D.A.B.N.M.

“Many spaces that physicians inhabit are sacred, and we dwell daily with those who are, in any given moment, experiencing the most pivotal events of their lives. It is here where we often find the deepest rewards of our work, and it is also here where we are most threatened to become calloused and cynical.”

—T. C. Yates, “Of Warsaw and Calgary”

**A**S an anesthesiologist administering a general anesthetic, I perform the ultimate example of episodic care. The encounter is focused around one episode, one specific procedure in a patient’s life. The patient is unconscious for most of the encounter, reduced to a set of parameters on a monitor and mostly hidden under surgical drapes, while human structures are exposed and worked on that normally don’t see the light of day. Thus, it is easy to slip into production-line mode: the preanesthetic evaluation done by one person, intraoperative anesthesia care by another, and recovery by another yet. Such a production mindset can make light of the fact that for most patients, having an operation is understandable—at least on some level—whereas being under general anesthesia is not. A frequent response to an upcoming surgical procedure is concern about specific complications, whereas a typical response to an upcoming anesthetic is anxiety.

“Your next patient is really cute,” the preoperative nurse tells me. Cute is not the first word that comes to mind as I prepare to see a small-for-age, developmentally delayed, 12-year-old with cerebral palsy in need of a revision of a ventriculoperitoneal shunt.

From the Department of Anesthesiology, University of Florida College of Medicine, Gainesville, Florida. cseubert@anest.ufl.edu.

Accepted for publication August 5, 2020. Published online first on September 8, 2020.

Permission to reprint granted to the American Society of Anesthesiologists, Inc. by copyright author/owner. Anesthesiology 2020; 133:1152–3. DOI: 10.1097/ALN.0000000000003533

I enter the preoperative bay to find a beaming boy, quite obviously not cowed by the difficult hand life has dealt him, accompanied by his friendly father. I sit on the boy's stretcher, a little closer than a stranger should—intentionally—not only to talk at eye level, but also to gauge the boy's response to strangers, knowing that what comes next will invade his space much more. He looks at me, interested—briefly—only to return to playing on the tablet computer in his hand. I ask the father how the boy handles procedures, given that many preceded this one. He likes to sing “twinkle, twinkle, little star” as he goes back for a procedure, his dad shares.

“Your next patient is really cute,” I tell the nurse anesthetist I'm working with. She is a reserved person with more than two decades of clinical experience, who does not suffer fools gladly. “Yes, he is,” says the young operating room nurse. We go to pick up our patient. After a “See you later” from dad, the nurse begins “twinkle, twinkle, little star” and our group finds its pitch as we sing and travel in the long hallways of our Neuromedicine Hospital. Patient support technicians, the essential low-wage workers who keep our operating rooms stocked and clean, turn their heads as we pass by. After the briefing in the operating room, the nurse anesthetist gently places a face mask providing nitrous oxide over the boy's nose and mouth. Under the stress of imminent events, the boy starts singing yet again. We join as sevoflurane is added to the inspired gas mixture. “Twinkle, twinkle, little star,” we sing, “and you're off to space,” the nurse anesthetist says, noting the arrival of unconsciousness, “where stars don't twinkle,” I say, ever the nerd. Why is that? Lack of atmosphere for refracting starlight. At the conclusion of the operation, we return a sleepy but comfortable boy to his father in the recovery room. As I return to the operating room to face my next task of the day, a patient support technician calls to me: “Hey, doc, I didn't know you could carry a tune...”

The production mindset in health care, which pushes us toward a state of perpetual preoccupation, also generates slogans used to advertise our work. Our slogan in neuromedicine is to “strive for the perfect patient experience.” Day after day we try, typically only to fall short, time and time again, for a frustratingly diverse and very human set of reasons. Sometimes, though, we get close. Humans caring for fellow humans. The tension between the production pressures, our patient's humanity, and the humanity of those delivering care, resolved. All stars.
